# Supplementary material for: Synthesis and Unique Behaviors of High-Purity HEA Nanoparticles Using Femtosecond Laser Ablation
Source: MDPI journal article supplement (doi:10.3390/nano14060554), 2024-03-21
Supplement: s1 [file s1]

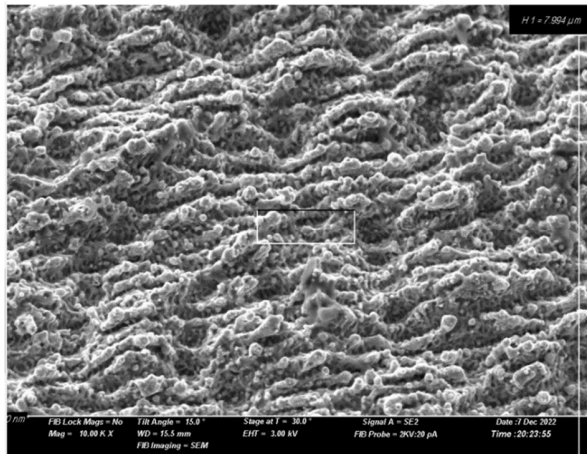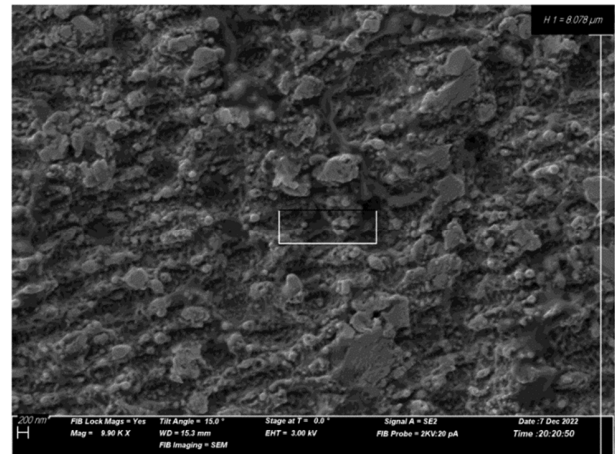

Figure S1 Morphology of ablated surface.

Figure S1 presents Laser-induced periodic surface ripples formed through femtosecond ablation on HEA target surface. Periodicity of  $\sim 200$  nm observed, in line with laser wavelength expected to induce such self-organized structures.
